# Supplementary material for: Systematic Evaluation of the Application of Zebrafish in Toxicology (SEAZIT): Developing a Data Analysis Pipeline for the Assessment of Developmental Toxicity with an Interlaboratory Study
Source: Toxics. 2023 Apr 25;11(5):407. doi: 10.3390/toxics11050407 (PMC10222636; doi:10.3390/toxics11050407)
Supplement: Supplementary file 1 [file toxics-11-00407-s001.zip › Table S1.xlsx]

## Sheet: protocol
Dataset ID		Embryo Setting			Assessment Timepoint		Plate Setting		Exposure		Vehicle Control (VC)		Positive Control (PC)			Test Substance (TS)
Dataset Name/abbreviated name	Test Condition	Zebrafish Strain	Embryo Dechorination	Incubation Temperature	time_24hpf	time_120hpf	plate_format	plate_n_embryo_well	exposure_volume	exposure_scenario	VC_name	VC_n_embryo_plate	PC_name	PC_conc	PC_n_embryo_concentration_plate	TS_n_embryo_conc_plate	TS_n_ts_plate	TS_conc	TS_test_freq
Dose Range Finding study, Lab A, Static Renewal-Chorion (SR-C)/ DRF_Lab A_SR-C	Static Renewal-Chorion (SR-C)	Wild-type strain AB	No	28.5 °C	Mortality	Mortality and Altered Phenotypes	96-well plate	1	100 µl E3 media + 100 µl test substance/DMSO solution	Exposure initated at 6 hpf and renewed daily until 120 hpf (i.e., static renewal)	0.5% DMSO	12	3,4-Dichloroaniline	0.78, 1.5, 3.13, 6.25, 12.5, 25, 50 µM	1	11	1	0.1, 0.3, 1, 3, 10, 30, 100 µM	Triplicate
Dose Range Finding study, Lab B, Static-Dechorion (S-DC)/ DRF_Lab B_S-DC	Static-Dechorion (S-DC)	Tropical 5D	Enzymatic (pronase) dechorionation at 4 hpf, prior to plating in 96-wells	28°C	Mortality and Altered Phenotypes	Mortality and Altered Phenotypes	96-well U-bottom plate	1	100 µl E2 media + 100 µl test substance/DMSO solution	Exposure initated at 6 hpf (static)	0.5% DMSO	12	3,4-Dichloroaniline	2, 2.62, 3.42, 4.47, 5.85, 7.65, 10 µM	1	7	1	1, 1.77, 3.15, 5.58, 9.89, 17.5, 24.8, 35, 49.4, 69.8, 100 µM	Triplicate
Dose Range Finding study, Lab B, Static-Dechorion (S-DC)/ DRF_Lab B_S-DC	Static-Chorion (S-C)	Wild-type strain AB	No	28.5 °C	Mortality	Mortality and Altered Phenotypes	96-well plate	1	100 µl E3 media + 100 µl test substance/DMSO solution	Exposure initated at 6 hpf (static)	0.5% DMSO	12	3,4-Dichloroaniline	0.78, 1.5, 3.13, 6.25, 12.5, 25, 50 µM	1	11	1	0.07, 0.24, 0.81, 2.71, 9.02, 30.01, 100 µM	Triplicate
hpf: hours post fertilization DMSO: dimethyl sulfoxide conc: concentration freq: frequency

## Sheet: substance
DTT ID	use_category2	use_category1	preferred_name	dtxsid	casrn	substance_type
TA-442	Flame Retardant	Flame Retardant	3,3',5,5'-Tetrabromobisphenol A	DTXSID1026081	79-94-7	Blinded Substance
TA-1287	WHO Essential Medicine	Drug	6-Propyl-2-thiouracil	DTXSID5021209	51-52-5	Blinded Substance
TA-2083	Natural Insecticide	Insecticide	Abamectin	DTXSID8023892	71751-41-2	Blinded Substance
TA-1472	Industrial Compound	Industrial Compound	Acetaldehyde	DTXSID5039224	75-07-0	Blinded Substance		why is use catergory 2 before catergory 1?
TA-236	Synthetic Insecticide	Insecticide	Aldicarb	DTXSID0039223	116-06-3	Blinded Duplicate		should CASRN and DTXSID be capitalized?
TA-236	Synthetic Insecticide	Insecticide	Aldicarb	DTXSID0039223	116-06-3	Blinded Duplicate
TA-2535	WHO Essential Medicine	Drug	Amoxicillin	DTXSID3037044	26787-78-0	Blinded Substance
TA-1245	WHO Essential Medicine	Drug	Aspirin	DTXSID5020108	50-78-2	Blinded Substance
TA-2242	Herbicide	Herbicide	Atrazine	DTXSID9020112	1912-24-9	Blinded Substance
TA-2246	Elementorganic Fungicide	Fungicide	Bis(tributyltin)oxide	DTXSID9020166	56-35-9	Blinded Substance
TA-1746	Industrial Compound	Industrial Compound	Bisphenol A	DTXSID7020182	80-05-7	Blinded Duplicate
TA-1746	Industrial Compound	Industrial Compound	Bisphenol A	DTXSID7020182	80-05-7	Blinded Duplicate
TA-15	WHO Essential Medicine	Drug	Caffeine	DTXSID0020232	58-08-2	Blinded Substance
TA-1017	Synthetic Insecticide	Insecticide	Chlorpyrifos	DTXSID4020458	2921-88-2	Blinded Substance
TA-2540	Synthetic Insecticide	Insecticide	Chlorpyrifos oxon	DTXSID1038666	5598-15-2	Blinded Substance
TA-2265	PAH	PAH	Dibenz(a,h)anthracene	DTXSID9020409	53-70-3	Blinded Substance
TA-575	Industrial Compound	Industrial Compound	Dibutyl phthalate	DTXSID2021781	84-74-2	Blinded Substance
TA-770	Non-essential Medicine	Drug	Diethylstilbestrol	DTXSID3020465	56-53-1	Blinded Substance
TA-2545	Herbicide	Herbicide	Fluazifop-butyl	DTXSID3034612	69806-50-4	Blinded Substance
TA-836	Elementorganic Fungicide	Fungicide	Flusilazole	DTXSID3024235	85509-19-9	Blinded Substance
TA-1643	Non-essential Medicine	Drug	Hydroxyurea	DTXSID6025438	127-07-1	Blinded Substance
TA-2547	Organic Fungicide	Fungicide	Iprodione	DTXSID3024154	36734-19-7	Blinded Substance
TA-532	Synthetic Insecticide	Insecticide	Lindane	DTXSID2020686	58-89-9	Blinded Substance
TA-2548	Herbicide	Herbicide	Linuron	DTXSID2024163	330-55-2	Blinded Substance
TA-2549	Organic Fungicide	Fungicide	Paclobutrazol	DTXSID2024242	76738-62-0	Blinded Substance
TA-1789	Polychlorinated Preservative	Preservative	Pentachlorophenol	DTXSID7021106	87-86-5	Blinded Substance
TA-1213	Synthetic Insecticide	Insecticide	Phorate	DTXSID4032459	298-02-2	Blinded Substance
TA-2554	WHO Essential Medicine	Drug	Propofol	DTXSID6023523	2078-54-8	Blinded Substance
TA-837	PAH	PAH	Pyrene	DTXSID3024289	129-00-0	Blinded Substance
TA-488	Natural Insecticide	Insecticide	Pyriproxyfen	DTXSID1032640	95737-68-1	Blinded Substance
TA-557	Non-essential Medicine	Drug	Resorcinol	DTXSID2021238	108-46-3	Blinded Substance
TA-1537	Natural Insecticide	Insecticide	Rotenone	DTXSID6021248	83-79-4	Blinded Substance
TA-2555	WHO Essential Medicine	Drug	Sodium valproate	DTXSID5037072	1069-66-5	Blinded Substance
TA-2321	Non-essential Medicine	Drug	Thalidomide	DTXSID9022524	50-35-1	Blinded Substance
TA-834	Organic Fungicide	Fungicide	Triadimefon	DTXSID3023897	43121-43-3	Blinded Substance
TA-1462	Polychlorinated Preservative	Preservative	Triclosan	DTXSID5032498	3380-34-5	Blinded Substance
TA-325	Flame Retardant	Flame Retardant	Triphenyl phosphate	DTXSID1021952	115-86-6	Blinded Substance
TA-2439	Flame Retardant	Flame Retardant	Tris(1,3-dichloro-2-propyl) phosphate	DTXSID9026261	13674-87-8	Blinded Substance
TA-1575	WHO Essential Medicine	Drug	Valproic acid	DTXSID6023733	99-66-1	Blinded Duplicate
TA-1575	WHO Essential Medicine	Drug	Valproic acid	DTXSID6023733	99-66-1	Blinded Duplicate
TA-73	Elementorganic Fungicide	Fungicide	Ziram	DTXSID0021464	137-30-4	Blinded Substance
TA-1812	Positive Control	Positive Control	3,4-Dichloroaniline	DTXSID7021815	95-76-1	Positive Control

## Sheet: ontology
proposed_ontology_label	ontology_id_number	lab_code	recording_id	recording_name	specific_note_provided_by_lab	hour_post_fertilization	defects_mapped_to_body_region_general	defects_mapped_to_body_region_granular	developmental_defect_grouping_granular	developmental_defect_grouping_general
whole organism dead, abnormal	ZP:0000306	Lab-A	22	Mortality		24	General		dead	dead
heart contraction rate, abnormal	ZP:0009432	Lab-A	25	Abnormal_heartbeat		120	Torso	heart	abnormal heart contraction rate	heart defects
whole organism length, abnormal	ZP:0012799	Lab-A	29	Abnormal_length		120	Torso	trunk	trunk length defect	torso defects
pigmentation abnormal, abnormal	ZP:0005882	Lab-A	28	Abnormal_pigmentation		120	Torso	pigment (whole animal)	pigmentation quality defect	abnormal pigmentation
heart contraction arrested, abnormal	ZP:0000463	Lab-A	32	Absence_heartbeat		120	Torso	heart	arrested heart contraction	arrested heart contraction
ventral mandibular arch morphology, abnormal	ZP:0007203	Lab-A	16	Altered_jaw_morphology		120	Head	jaw	craniofacial defects	head defects
snout malformed, abnormal	ZP:0014550	Lab-A	20	Altered_snout		120	Head	snout	craniofacial defects	head defects
axis curved, abnormal	ZP:0005012	Lab-A	31	Curved_axis		120	Torso	trunk	trunk curvature defects	torso defects
pigmentation occurrence, abnormal	ZP:0008648	Lab-A	33	Decreased_absent_pigmentation		120	Torso	pigment	pigmentation quanity defect	abnormal pigmentation
hatching delayed, abnormal	ZP:0003211	Lab-A	27	Delayed_Hatching		120	General		hatching defect	hatching defect
somite quality, abnormal	ZP:0000011	Lab-A	18	Malformed__disorganized_or_missing_somites		120	Torso	trunk	malformed or missing torso defect	torso defects
fin morphology, abnormal	ZP:0004992	Lab-A	14	Malformed_or_missing_caudal_fin		120	Appendage	fin	caudal fin defects	fin defects
otic vesicle morphogenesis disrupted, abnormal	ZP:0002133	Lab-A	35	Malformed_or_missing_otic_vesicle		120	Head	otic vesicle	nervous system defects	head defects
trunk morphology, abnormal	ZP:0003437	Lab-A	30	Malformed_or_missing_trunk		120	Torso	trunk	malformed or missing torso defect	torso defects
whole organism dead, abnormal	ZP:0000306	Lab-A	23	Mortality		120	General		dead	dead
notochord morphology, abnormal	ZP:0000624	Lab-A	36	Notochord_malformation		120	Torso	trunk	malformed or missing torso defect	torso defects
abnormal	PATO:0000460	Lab-A	34	Others		120	General
head edematous, abnormal	ZP:0001451	Lab-A	24	Presence_of_head_Edema		120	Head	head	craniofacial defects	head defects
heart edematous, abnormal	ZP:0001192	Lab-A	15	Presence_of_pericardial_Edema		120	Torso	heart	heart edema	heart defects
eye decreased size, abnormal	ZP:0000043	Lab-A	26	Smaller_abnormal_eye_shape		120	Head	eye	craniofacial defects	head defects
head decreased size, abnormal	ZP:0000054	Lab-A	19	Smaller_abnormal_head_shape		120	Head	head	craniofacial defects	head defects
yolk opaque, abnormal	ZP:0002198	Lab-A	21	Yolk_opacity		120	Torso	yolk	yolk quality defect	yolk defects
yolk edematous, abnormal	ZP:0002060	Lab-A	17	Yolk_sac_Edema		120	Torso	yolk	yolk quality defect	yolk defects
embryo development arrested, abnormal	ZP:0000305	Lab-B	54	DP24	Development delayed at 24 hpf	24	General
whole organism dead, abnormal	ZP:0000306	Lab-B	2	Mortality		24	General		dead	dead
locomotion involved in locomotory behavior process quality, abnormal	ZP:0009084	Lab-B	60	SM24	Spontaneous movement at 24 hpf	24	General
axis curved, abnormal	ZP:0005012	Lab-B	4	AXIS	Curved or bent axis in either direction	120	Torso	trunk	trunk curvature defects	torso defects
brain morphology, abnormal	ZP:0000100	Lab-B	51	BRN_	Brain malformations or necrosis	120	Head	brain	nervous system defects	head defects
otic vesicle morphology, abnormal	ZP:0001601	Lab-B	51	BRN_	Brain malformations or necrosis	120	Head	otic vesicle	nervous system defects	head defects
pectoral fin physical object quality, abnormal	ZP:0008625	Lab-B	51	BRN_	Brain malformations or necrosis	120	Appendage	fin	pectoral fin defects	fin defects
ventral mandibular arch morphology, abnormal	ZP:0007203	Lab-B	6	CRAN	Malformed, missing or smaller than normal the eye, snout, and/or jaw	120	Head	jaw	craniofacial defects	head defects
snout malformed, abnormal	ZP:0014550	Lab-B	6	CRAN	Malformed, missing or smaller than normal the eye, snout, and/or jaw	120	Head	snout	craniofacial defects	head defects
eye decreased size, abnormal	ZP:0000043	Lab-B	6	CRAN	Malformed, missing or smaller than normal the eye, snout, and/or jaw	120	Head	eye	craniofacial defects	head defects
eye morphology, abnormal	ZP:0000943	Lab-B	6	CRAN	Malformed, missing or smaller than normal the eye, snout, and/or jaw	120	Head	eye	craniofacial defects	head defects
heart edematous, abnormal	ZP:0001192	Lab-B	7	EDEM	Heart and/or yolk sac malformation pericardial or yolk sac edema (fluid around the heart)	120	Torso	heart	heart edema	heart defects
yolk edematous, abnormal	ZP:0002060	Lab-B	7	EDEM	Heart and/or yolk sac malformation pericardial or yolk sac edema (fluid around the heart)	120	Torso	yolk	yolk quality defect	yolk defects
trunk morphology, abnormal	ZP:0003437	Lab-B	8	LTRK	Malformation of the lower trunk, posterior of the yolk sac, including caudal fin region	120	Torso	trunk	malformed or missing torso defect	torso defects
caudal fin physical object quality, abnormal	ZP:0010405	Lab-B	8	LTRK	Malformation of the lower trunk, posterior of the yolk sac, including caudal fin region	120	Appendage	fin	caudal fin defects	fin defects
whole organism dead, abnormal	ZP:0000306	Lab-B	9	Mortality		120	General		dead	dead
life cycle	ZP:000011	Lab-B	10	MUSC	Abnormal swim bladder, muscle pattern, blood circulation	120	General
swim bladder inflation delayed, abnormal	ZP:0020238	Lab-B	10	MUSC	Abnormal swim bladder, muscle pattern, blood circulation	120	Torso	swim bladder	swim bladder defect	swim bladder defect
notochord morphology, abnormal	ZP:0000624	Lab-B	55	NC__	Notochord and bent tail	120	Torso	trunk	malformed or missing torso defect	torso defects
hatching delayed, abnormal	ZP:0003211	Lab-B	56	NOHT	no hatching by 120 hpf	120	General		hatching defect	hatching defect
pigment cell amount, abnormal	ZP:0100440	Lab-B	12	SKIN	Hypo- or hyper-pigmented	120	Torso	pigment	pigmentation quanity defect	abnormal pigmentation
sensory perception of touch occurrence, abnormal	ZP:0015467	Lab-B	13	TCHR	Not responsive to touch	120	General	sensory
whole organism dead, abnormal	ZP:0000306	Lab-C	48	Mortality		24	General		dead	dead
axis curved, abnormal	ZP:0005012	Lab-C	37	Axis__curvature_of_body_axis	boolean phenotype, lateral	120	Torso	trunk	trunk curvature defects	torso defects
head edematous, abnormal	ZP:0001451	Lab-C	41	Craniofacial__edema	boolean phenotype, dorsal	120	Head	head	craniofacial defects	head defects
eye decreased size, abnormal	ZP:0000043	Lab-C	52	Craniofacial__eye_defects	eye diameter increased or decreased as compared to DMSO (meanDMSO +/- 2* stdDMSO), dorsal	120	Head	eye	craniofacial defects	head defects
ventral mandibular arch morphology, abnormal	ZP:0007203	Lab-C	49	Craniofacial__jaw_defects	boolean phenotype, lateral	120	Head	jaw	craniofacial defects	head defects
otic vesicle size, abnormal	ZP:0015199	Lab-C	53	Craniofacial__otic_vesicle_crossection_area		120	Head	otic vesicle	nervous system defects	head defects
snout malformed, abnormal	ZP:0014550	Lab-C	39	Craniofacial__snout_defects	boolean phenotype, lateral	120	Head	snout	craniofacial defects	head defects
pectoral fin malformed, abnormal	ZP:0003538	Lab-C	50	fin_absence	boolean phenotype, dorsal	120	Appendage	fin	pectoral fin defects	fin defects
whole organism dead, abnormal	ZP:0000306	Lab-C	44	Mortality		120	General		dead	dead
necrotic cell death	GO:0070265	Lab-C	40	necrosis	boolean phenotype, lateral	120	General
notochord morphology, abnormal	ZP:0000624	Lab-C	38	notochord_defect	boolean phenotype, lateral	120	Torso	trunk	malformed or missing torso defect	torso defects
otic vesicle morphology, abnormal	ZP:0001601	Lab-C	47	otoliths_defects	boolean phenotype, lateral	120	Head	otic vesicle	nervous system defects	head defects
heart edematous, abnormal	ZP:0001192	Lab-C	57	Percardial_tissue__Edema	pericardial area increased as compared to DMSO (meanDMSO +/- 2* stdDMSO), lateral	120	Torso	heart	heart edema	heart defects
pigmentation abnormal, abnormal	ZP:0005882	Lab-C	58	Pigment__abnormal	pigment area increased or decreased as compared to DMSO (meanDMSO +/- 2* stdDMSO), dorsal	120	Torso	pigment (whole animal)	pigmentation quality defect	abnormal pigmentation
pigmentation decreased intensity, abnormal	ZP:0005986	Lab-C	59	Pigment__decreased	pigment area decreased as compared to DMSO (meanDMSO +/- 2* stdDMSO), dorsal	120	Torso	pigment	pigmentation quanity defect	abnormal pigmentation
scoliosis	EFO:0004273	Lab-C	42	scoliosis	boolean phenotype, lateral and dorsal	120	Torso	trunk	scoliosis	torso defects
trunk curvature, abnormal	ZP:0004245	Lab-C	45	tail_bending	boolean phenotype, lateral	120	Torso	trunk	trunk curvature defects	torso defects
trunk increased size, abnormal	ZP:0014050	Lab-C	61	Trunk__long	body length increased as compared to DMSO (meanDMSO +/- 2* stdDMSO), lateral	120	Torso	trunk	trunk length defect	torso defects
trunk decreased length, abnormal	ZP:0000026	Lab-C	62	Trunk__short	body length decreased as compared to DMSO (meanDMSO +/- 2* stdDMSO), lateral	120	Torso	trunk	trunk length defect	torso defects
hatching delayed, abnormal	ZP:0003211	Lab-C	46	Unhatched	embryos inside chorion at 120hpf	120	General		hatching defect	hatching defect
yolk edematous, abnormal	ZP:0002060	Lab-C	43	Yolk_sac__Edema	boolean phenotype, lateral	120	Torso	yolk	yolk quality defect	yolk defects
yolk normal size, abnormal	ZP:0138675	Lab-C	63	Yolk_sac__size	yolk area increased or decreased as compared to DMSO (meanDMSO +/- 2* stdDMSO), lateral	120	Torso	yolk	Yolk size defect	yolk defects
yolk decreased size, abnormal	ZP:0002186	Lab-C	64	Yolk_sac__size_decreased	yolk area decreased as compared to DMSO (meanDMSO +/- 2* stdDMSO), lateral	120	Torso	yolk	Yolk size defect	yolk defects
yolk increased size, abnormal	ZP:0000102	Lab-C	65	Yolk_sac__size_increased	yolk area increased as compared to DMSO (meanDMSO +/- 2* stdDMSO), lateral	120	Torso	yolk	Yolk size defect	yolk defects
						can this column be left justified?

## Sheet: BMR
bmr	endpoint_name	lab_code	hour_post_fertilization
25	Presence_of_head_Edema+Mort@120	Lab-A	120
20	Mortality@24	Lab-A	24
25	Malformed_or_missing_trunk+Mort@120	Lab-A	120
25	Abnormal_pigmentation+Mort@120	Lab-A	120
25	Decreased_absent_pigmentation+Mort@120	Lab-A	120
25	Delayed_Hatching+Mort@120	Lab-A	120
25	Malformed__disorganized_or_missing_somites+Mort@120	Lab-A	120
25	Malformed_or_missing_caudal_fin+Mort@120	Lab-A	120
25	Malformed_or_missing_otic_vesicle+Mort@120	Lab-A	120
25	Notochord_malformation+Mort@120	Lab-A	120
30	Abnormal_length+Mort@120	Lab-A	120
30	MalformedAny+Mort@120	Lab-A	120
30	Smaller_abnormal_head_shape+Mort@120	Lab-A	120
30	Altered_snout+Mort@120	Lab-A	120
25	Abnormal_heartbeat+Mort@120	Lab-A	120
25	Mortality@120	Lab-A	120
25	Others+Mort@120	Lab-A	120
25	Yolk_opacity+Mort@120	Lab-A	120
30	Presence_of_pericardial_Edema+Mort@120	Lab-A	120
30	Altered_jaw_morphology+Mort@120	Lab-A	120
25	Absence_heartbeat+Mort@120	Lab-A	120
30	Curved_axis+Mort@120	Lab-A	120
30	Yolk_sac_Edema+Mort@120	Lab-A	120
30	Smaller_abnormal_eye_shape+Mort@120	Lab-A	120
40	AXIS+Mort@120	Lab-B	120
35	TCHR+Mort@120	Lab-B	120
40	CRAN+Mort@120	Lab-B	120
35	DP24+Mort@24	Lab-B	24
40	EDEM+Mort@120	Lab-B	120
35	MalformedAny+Mort@120	Lab-B	120
35	MalformedAny+Mort@24	Lab-B	24
35	Mortality@120	Lab-B	120
35	Mortality@24	Lab-B	24
35	MUSC+Mort@120	Lab-B	120
35	NC__+Mort@120	Lab-B	120
40	BRN_+Mort@120	Lab-B	120
40	LTRK+Mort@120	Lab-B	120
35	SKIN+Mort@120	Lab-B	120
35	SM24+Mort@24	Lab-B	24
20	Mortality@120	Lab-C	120
35	MalformedAny+Mort@120	Lab-C	120
30	notochord_defect+Mort@120	Lab-C	120
35	necrosis+Mort@120	Lab-C	120
30	Craniofacial__jaw_defects+Mort@120	Lab-C	120
25	fin_absence+Mort@120	Lab-C	120
30	scoliosis+Mort@120	Lab-C	120
25	Craniofacial__edema+Mort@120	Lab-C	120
35	Trunk__short+Mort@120	Lab-C	120
30	tail_bending+Mort@120	Lab-C	120
30	Yolk_sac__Edema+Mort@120	Lab-C	120
20	Mortality@24	Lab-C	24
30	Axis__curvature_of_body_axis+Mort@120	Lab-C	120
30	Craniofacial__snout_defects+Mort@120	Lab-C	120
35	Percardial_tissue__Edema+Mort@120	Lab-C	120
40	Yolk_sac__size+Mort@120	Lab-C	120
30	Yolk_sac__size_decreased+Mort@120	Lab-C	120
40	Craniofacial__eye_defects+Mort@120	Lab-C	120
40	Pigment__abnormal+Mort@120	Lab-C	120
35	Trunk__long+Mort@120	Lab-C	120
40	Pigment__decreased+Mort@120	Lab-C	120
35	Craniofacial__otic_vesicle_crossection_area+Mort@120	Lab-C	120
35	Yolk_sac__size_increased+Mort@120	Lab-C	120
20	Unhatched+Mort@120	Lab-C	120
left justifiy columns with numbers?
